# Supplementary material for: A micellized fluorescence sensor based on amplified quenching for highly sensitive detection of non-transferrin-bound iron in serum
Source: Royal Society of Chemistry journal article supplement (doi:10.1039/d0dt00026d), 2020-01-01
Supplement: d0dt00026d1.pdf [file d0dt00026d1.pdf]

## Supplementary Information

For

A micellized fluorescence sensor based on amplified quenching for highly sensitive detection of non-transferrin-bound iron in serum

Tae Eun Park and Seoung Ho Lee\*

*Department of Chemistry, Institute of Basic Sciences, Daegu University, Gyeongsan, 38453, Korea*

### Experimental

#### Materials

All chemicals used in the synthesis were of reagent grade and used without further purification. Pyrene, Methyl 11-bromoundecanoate, 4,4'-Di-*tert*-butyl-2,2'-bipyridine, (1,5-Cyclooctadiene)(methoxy)iridium(I) dimer, and Acetonitrile were purchased from Sigma-Aldrich Chemical Company. Bis(pinacolato)diboron, Sodium hydroxide, Methanol, Cyclohexane, Hexane, Dichloromethane, Ethyl acetate were bought from Daejung Company. Ferric hydroxide polymaltose complex was purchased from Ilyang Pharmaceutical Co., Ltd. Silica gel (Merck, 230-400 mesh) was used for chromatographic purification of all of intermediate and target molecules. All other chemicals and solvents were purchased from Sigma-Aldrich, Fisher Scientific, or Acros Chemical Company and used as received.

#### Instrumentation and Methods

NMR spectra were recorded using a Bruker (AVANCE III 500 and AVANCE NEO 900), operating at 500 MHz for <sup>1</sup>H-NMR and at 125, 225 MHz for <sup>13</sup>C-NMR. High-resolution mass spectra (HRMS) were obtained by Synapt G2-HDMS mass spectrometer (Waters). Elemental analysis (EA) was measured with Flash 2000D. Infrared spectra were measured with Thermo Fisher Scientific Nicolet iS5 FTIR spectrometer. UV/Vis absorption spectra were recorded using

a Sinco Mega-2100 UV-Vis spectrometer. Steady-state fluorescence spectra were obtained with a Shimadzu fluorometer RF-6000. Lifetime measurements were carried out using a PicoQuant FluoTime 200 Compact Fluorescence Lifetime Spectrometer. A 1 cm quartz cuvette was used for all spectral measurements. Dynamic light scattering (DLS) experiments were performed with Zetasizer Nano ZS from Malvern Panalytical. Scanning Electron Microscopy (SEM) images were obtained with a Field Emission Scanning Electron Microscope (FE-SEM).

Stock solution (3.0 mM) of **1** was prepared in DMSO. The solution has been kept at the room temperature for one hour before use. The chloride salts of Li<sup>+</sup>, Na<sup>+</sup>, K<sup>+</sup>, Cs<sup>+</sup>, Mg<sup>2+</sup>, Ca<sup>2+</sup>, Sr<sup>2+</sup>, Ba<sup>2+</sup>, Mn<sup>2+</sup>, Fe<sup>2+</sup>, Co<sup>2+</sup>, Ni<sup>2+</sup>, Cu<sup>2+</sup>, Zn<sup>2+</sup>, Cd<sup>2+</sup>, Hg<sup>2+</sup>, Sn<sup>2+</sup>, Pb<sup>2+</sup>, and Fe<sup>3+</sup> ions (stock solutions = 10.0 mM in H<sub>2</sub>O) were tested to evaluate the metal ion binding properties of **1**.

## Synthesis

2-Hydroxypyrene (**2**) was prepared in a good yield as described in the literature.<sup>1</sup>

**Methyl 11-(pyren-2-yloxy)undecanoate (3)**. To a solution of 2-hydroxypyrene (**2**) (2.00 g, 9.2 mmol) in dried CH<sub>3</sub>CN (100 mL), anhydrous K<sub>2</sub>CO<sub>3</sub> (3.80 g, 27.5 mmol) was added. After stirring for 30 min, methyl 11-bromoacetate (2.43 mL, 7.5 mmol) was added to the reaction mixture. The resulting mixture was vigorously stirred at 80 °C for 24 hours under argon gas. After the reaction mixture was cooled to room temperature, the solvent was removed *in vacuo*. The reaction mixture was acidified with 5 % aqueous HCl solution (100 mL), and then extracted with CH<sub>2</sub>Cl<sub>2</sub> (200 mL). The organic layer was separated and washed with water (100 mL) and dried over anhydrous MgSO<sub>4</sub>, and the solvent was evaporated to yield a yellow solid. The pure product was isolated by column chromatography on silica gel using dichloromethane:hexane (1:3) as the eluent. 84.2% yield.; <sup>1</sup>H NMR (500 MHz, CD<sub>2</sub>Cl<sub>2</sub>): δ 8.05 (d, 2H, *J* = 7.6 Hz), 7.95 (d, 2H, *J* = 9.0 Hz), 7.98 (d, 2H, *J* = 9.0 Hz), 7.83 (t, 1H, *J* = 7.6 Hz), 7.61 (s, 2H), 4.14 (t, 2H, *J* = 6.6 Hz), 3.53 (s, 3H), 2.18 (t, 2H, *J* = 7.7 Hz), 1.81 (m, 2H), 1.47 (m, 4H), 1.27 (m, 10H); <sup>13</sup>C NMR (125 MHz, CD<sub>2</sub>Cl<sub>2</sub>): δ 174.0, 157.5, 132.6, 130.14, 127.90, 126.80, 125.20, 124.90, 124.60, 119.80, 111.0, 68.5, 51.5, 34.0, 29.5, 29.4, 29.3, 29.1, 26.1, 25.0; ESI(+) HRMS (*m/z*): [M+Na]<sup>+</sup> calcd. for C<sub>28</sub>H<sub>32</sub>NaO<sup>3+</sup>, 439.2244; found, 439.2245.

**Sodium 11-(pyren-2-yloxy)undecanoate (1)**. To a solution of methyl 11-(pyren-2-yloxy)undecanoate (**3**) (1.00 g, 2.4 mmol) in MeOH/H<sub>2</sub>O (30 mL, 2:3, *v/v*), NaOH (0.29 g, 7.3

mmol) in water (1 mL) was added dropwise. The reaction mixture was vigorously stirred at 90 °C for 24 hours. The reaction mixture was cooled to room temperature, and then poured into a solution of methanol (300 mL) and diethyl ether (100 mL) to give the fine white solid **1** precipitate. 76% yield.; <sup>1</sup>H NMR (500 MHz; DMSO-*d*<sub>6</sub>): δ 8.25 (d, 2H, *J* = 7.7 Hz), 8.15 (d, 2H, *J* = 9.0 Hz), 8.11 (d, 2H, *J* = 9.0 Hz), 7.99 (t, 1H, *J* = 7.6 Hz), 7.90 (s, 2H), 4.28 (t, 2H, *J* = 6.6 Hz), 1.87 (m, 2H), 1.80 (t, 2H, *J* = 7.3 Hz), 1.53 (m, 2H), 1.40 (m, 4H), 1.24 (m, 8H); <sup>13</sup>C NMR (225 MHz, DMSO-*d*<sub>6</sub>): δ 175.7, 157.1, 132.2, 129.6, 127.8, 126.8, 125.2, 125.1, 123.8, 119.0, 111.0, 68.0, 40.0, 39.8, 39.7, 39.6, 39.5, 39.4, 39.3, 39.2, 29.5, 29.2, 29.1, 28.9, 26.6, 25.6; ESI(+) HRMS (*m/z*): [M+H]<sup>+</sup> calcd. for C<sub>27</sub>H<sub>30</sub>O<sub>3</sub>Na, 425.2087; found, 425.2090; Anal. calcd. for C<sub>27</sub>H<sub>29</sub>O<sub>3</sub>Na: C, 76.39; H, 6.89; O, 11.31. found; C, 73.09; H, 6.85; O, 10.91.

**Serum lipid extraction with organic solvent.** Extraction with a chloroform-methanol mixture was based on the methodology of Folch et al.<sup>2</sup> 4 mL of normal human serum was added to 10 mL of chloroform-methanol (2:1, *v/v*). The mixture was agitated manually for 1 minute and centrifuged at 4000 rpm for 10 minutes at room temperature. After centrifugation, the aqueous phase was collected and repeated once more with hexane.<sup>3</sup>

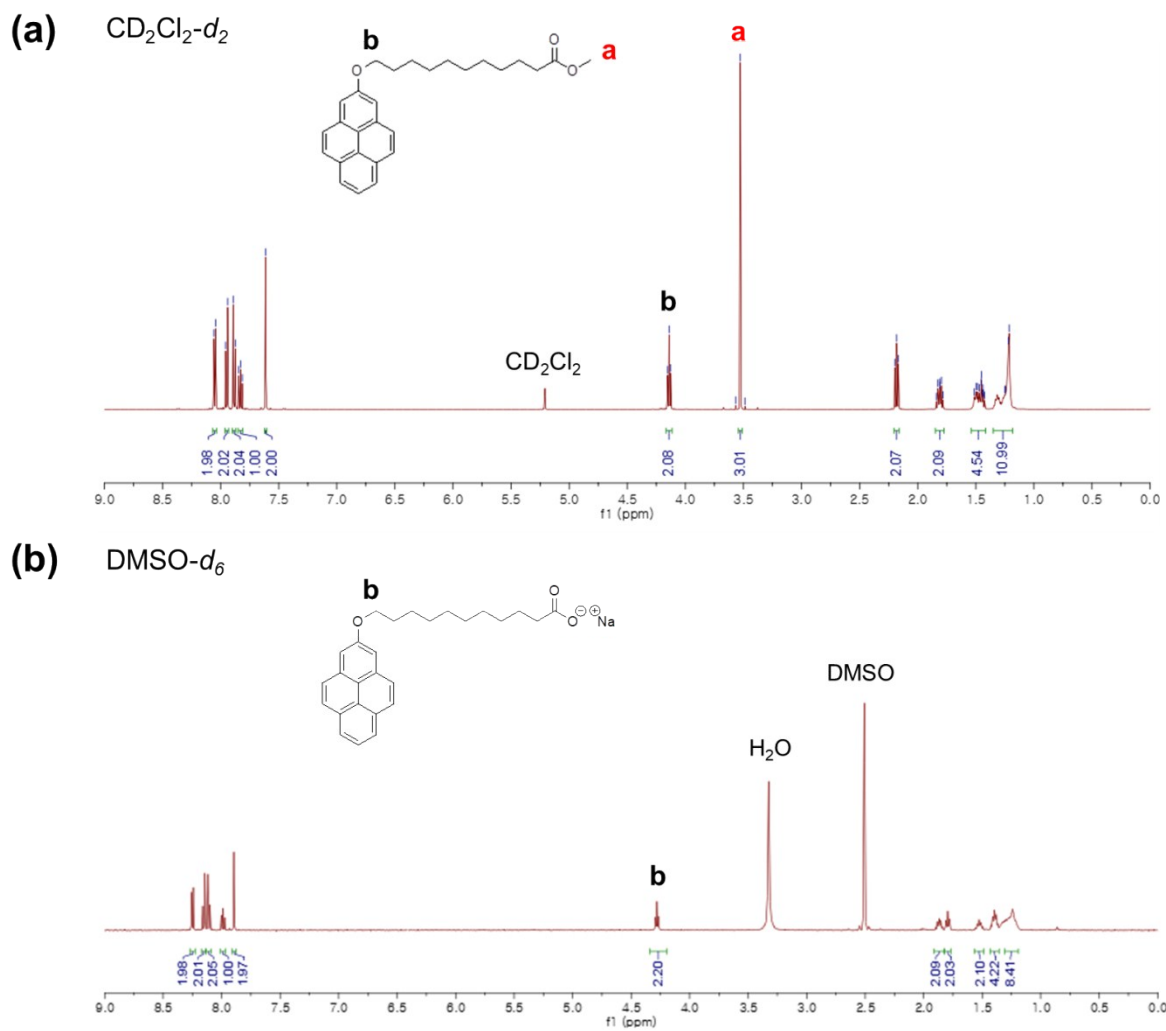

**Fig. S1**  $^1H$  NMR spectra of precursor **3** in  $CD_2Cl_2$  and an amphiphilic monomer **1** in  $DMSO$ .

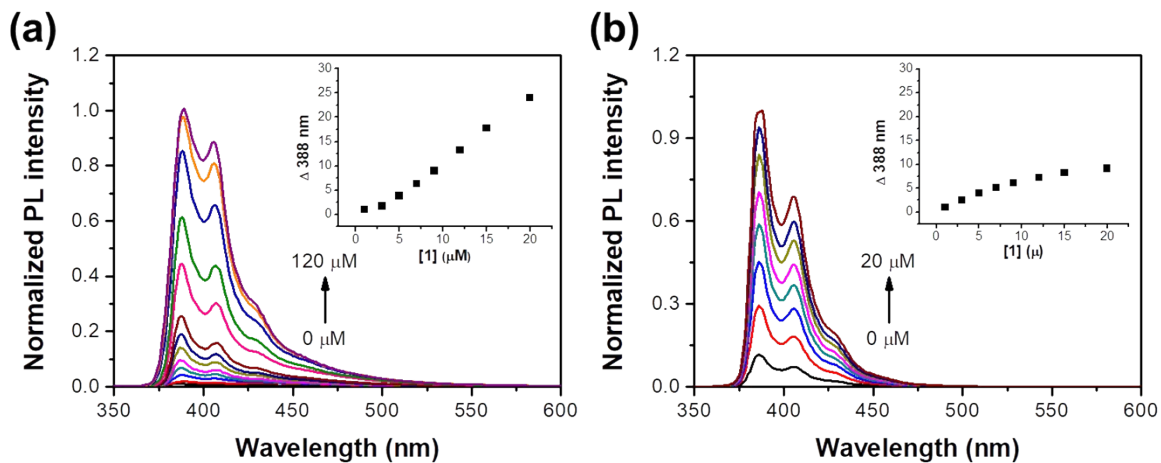

**Fig. S2** Fluorescence emission spectra of **1** with increasing concentration (1~120  $\mu\text{M}$ ) in (a)  $\text{H}_2\text{O}$  and (b) DMSO.

**Table S1** Fluorescence quantum yields of **1** upon the addition of  $\text{Fe}^{3+}$  or  $\text{Fe}^{2+}$  ions.

|                    | <b>1</b> | <b>1</b> + $\text{Fe}^{3+}$ | <b>1</b> + $\text{Fe}^{2+}$ |
|--------------------|----------|-----------------------------|-----------------------------|
| $\Phi_{\text{FL}}$ | 5.0%     | 0.45%                       | 5.1%                        |

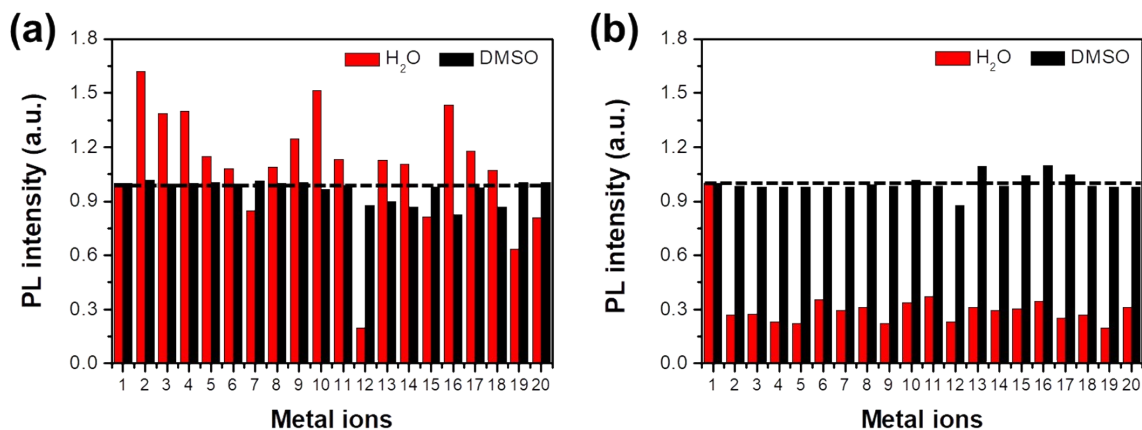

**Fig. S3** (a) Fluorescence intensity changes of **1** ( $5.0 \times 10^{-6}$  M) in H<sub>2</sub>O and DMSO upon the addition of various metal ions ( $3.0 \times 10^{-6}$  M); (b) Fluorescence intensity changes of **1** ( $5.0 \times 10^{-6}$  M) in H<sub>2</sub>O and DMSO toward Fe<sup>3+</sup> ions in the presence of other metal ions ( $5.0 \times 10^{-6}$  M). 1: blank, the chloride salts of metal ions: 2: Li<sup>+</sup>, 3: Na<sup>+</sup>, 4: K<sup>+</sup>, 5: Cs<sup>+</sup>, 6: Mg<sup>2+</sup>, 7: Ca<sup>2+</sup>, 8: Sr<sup>2+</sup>, 9: Ba<sup>2+</sup>, 10: Mn<sup>2+</sup>, 11: Fe<sup>2+</sup>, 12: Fe<sup>3+</sup>, 13: Co<sup>2+</sup>, 14: Ni<sup>2+</sup>, 15: Cu<sup>2+</sup>, 16: Ag<sup>+</sup>, 17: Zn<sup>2+</sup>, 18: Cd<sup>2+</sup>, 19: Sn<sup>2+</sup>, 20: Pb<sup>2+</sup>. Excitation at 329 nm/H<sub>2</sub>O, 341 nm/DMSO; fluorescence intensity was monitored at 388 nm; [Na<sup>+</sup>]=[K<sup>+</sup>]=[Ca<sup>2+</sup>]= $1.0 \times 10^{-3}$  M.

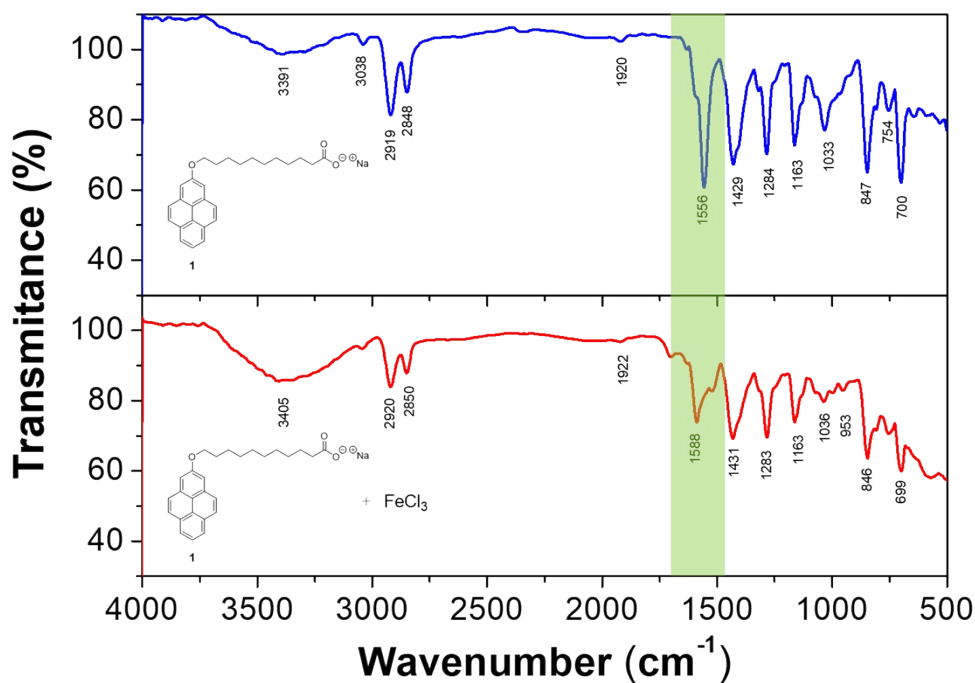

**Fig. S4** IR spectra of **1** and **1-Fe<sup>3+</sup>** complex.

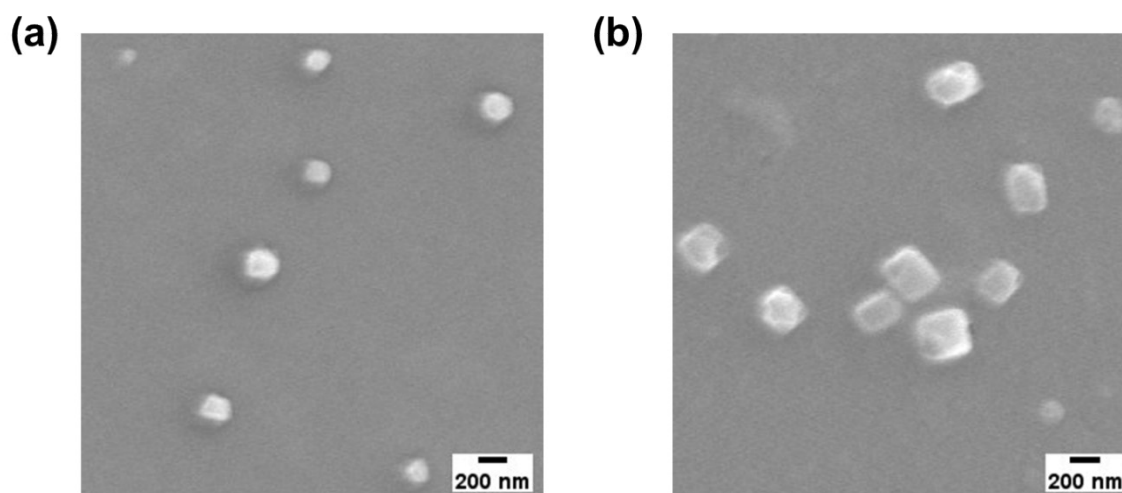

**Fig. S5** SEM image of **1** upon the addition of Fe<sup>3+</sup> ions in H<sub>2</sub>O: (a) **1** and (b) **1**-Fe<sup>3+</sup> ions.

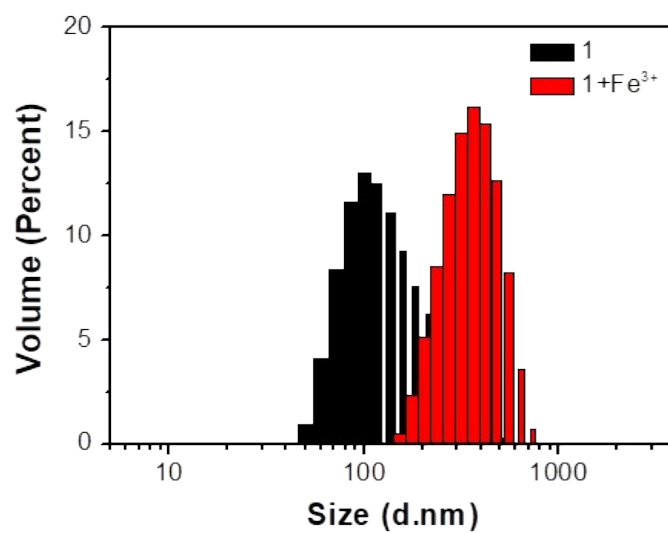

**Fig. S6** Hydrodynamic radii obtained from DLS for **1** ( $5.0 \times 10^{-6}$  M) upon the addition of Fe<sup>3+</sup> ions ( $3.0 \times 10^{-6}$  M).

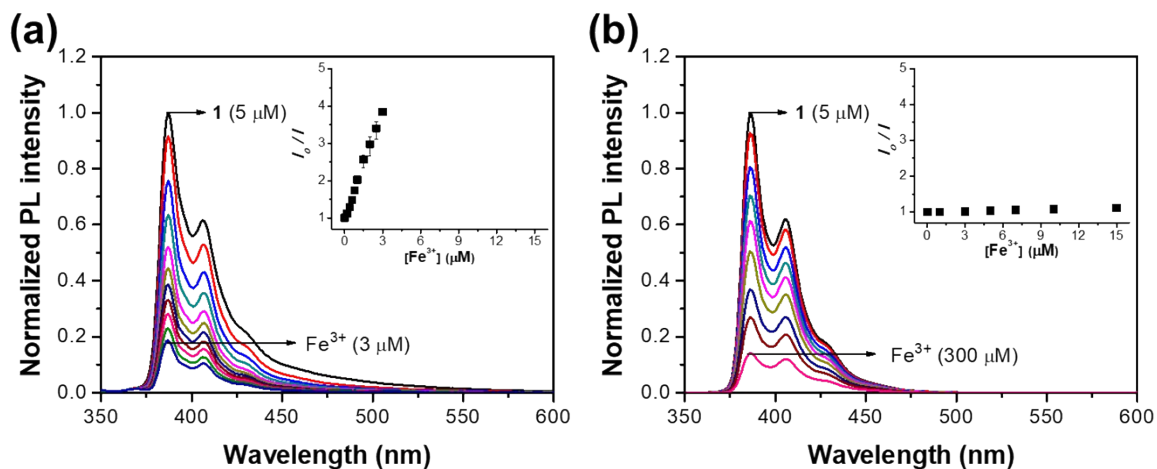

**Fig. S7** Fluorescence intensity changes and Stern-Volmer (SV) plots (inset) of **1** ( $5.0 \times 10^{-6}$  M) upon the addition of various amounts of  $\text{Fe}^{3+}$  ions in (a)  $\text{H}_2\text{O}$  and (b) DMSO. Excitation at 329 nm/ $\text{H}_2\text{O}$ , 341 nm/DMSO.

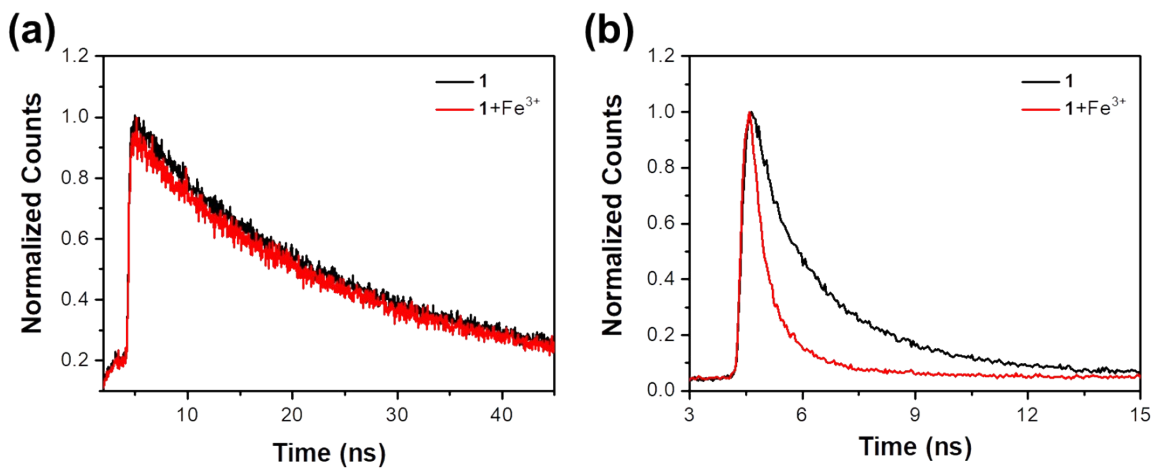

**Fig. S8** Time-resolved Fluorescence decay of **1** ( $5.0 \times 10^{-6}$  M) upon the addition of  $\text{Fe}^{3+}$  in DMSO and aqueous solution. Excitation at 370 nm; lifetime decay was monitored at 390 nm.



**Table S2** Comparison of **1** with recently reported Fe<sup>3+</sup> sensors.

| Sensors                                | Response Type       | LOD ( $\mu\text{M}$ )                  | Reaction Media                                    | Rf |
|----------------------------------------|---------------------|----------------------------------------|---------------------------------------------------|----|
| Dansyl Based derivative                | Fluorescence        | $6.2 \times 10^{-1}$                   | EtOH/H <sub>2</sub> O<br>(1:1, v/v)               | 4  |
| Poly Electrospun<br>Nanofiber Hydrogel | Color               | 61.5                                   | H <sub>2</sub> O                                  | 5  |
| Anthracene Based<br>derivative         | Color               | $4.4 \times 10^{-1}$                   | DMF                                               | 6  |
| Rhodamin derivation                    | Fluorescence        | $7.4 \times 10^{-1}$                   | CH <sub>3</sub> CN/H <sub>2</sub> O<br>(1:1, v/v) | 7  |
| Nitrogen-doped carbon<br>dots          | Color               | $5.7 \times 10^{-1}$                   | CDs/PVA films                                     | 8  |
| <b>Our Works</b>                       | <b>Fluorescence</b> | <b><math>7.0 \times 10^{-2}</math></b> | <b>H<sub>2</sub>O</b>                             |    |

**Table S3** Fluorescence lifetimes ( $\tau_i$ , ns) and relative amplitudes (RA, %) for **1** and **1-Fe<sup>3+</sup>** in H<sub>2</sub>O.

| Condition             | Samples                  | $\tau_1$ (ns) | RA (%) | $\tau_2$ (ns) | RA (%) |
|-----------------------|--------------------------|---------------|--------|---------------|--------|
| <b>H<sub>2</sub>O</b> | <b>1</b>                 | 0.97          | 97.44  | 3.15          | 2.55   |
|                       | <b>1-Fe<sup>3+</sup></b> | 0.35          | >99    | 1.19          | trace  |
| <b>DMSO</b>           | <b>1</b>                 | 20            | 100%   | -             | -      |
|                       | <b>1-Fe<sup>3+</sup></b> | -             | -      | -             | -      |

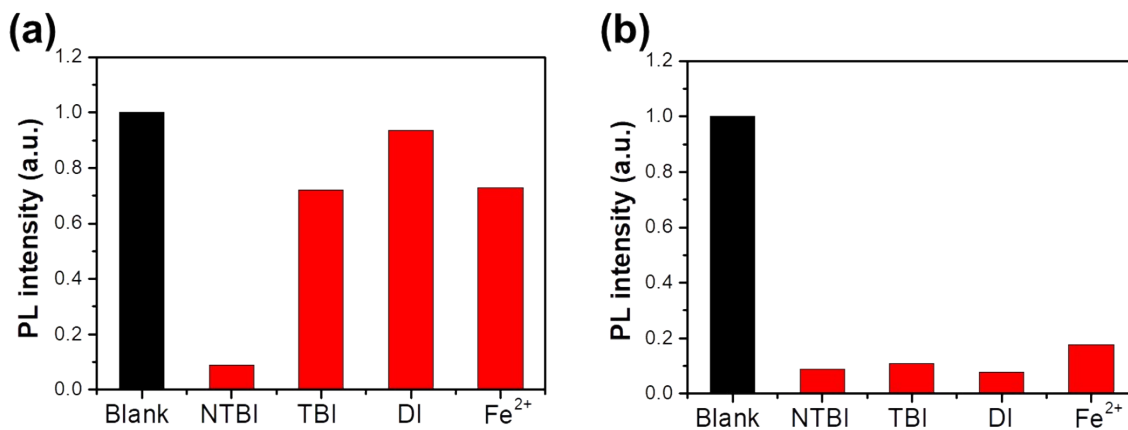

**Fig. S9** (a) Fluorescence intensity changes of **1** (5.0 × 10<sup>-6</sup> M) in diluted serum (10%) upon the addition of NTBI, TBI, DI, and Fe<sup>2+</sup> (2.0 × 10<sup>-5</sup> M); (b) Fluorescence intensity changes of **1** (5.0 × 10<sup>-6</sup> M) in diluted serum (10%) toward Fe<sup>3+</sup> ions in the presence of other competitive substances; Excitation at 329 nm; fluorescence intensity was monitored at 388 nm.

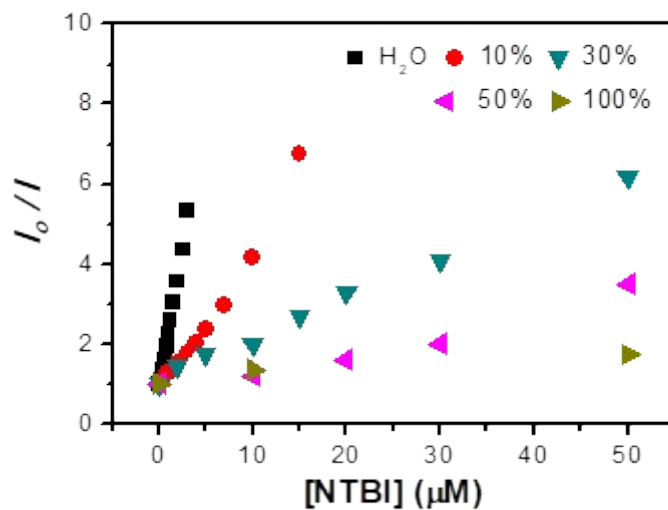

**Fig. S10** Fluorescence intensity changes of **1** ( $5.0 \times 10^{-6}$  M) in diluted serum (10%) upon the addition of NTBI, TBI, DI, and  $\text{Fe}^{2+}$  ( $2.0 \times 10^{-5}$  M). Excitation at 329 nm; fluorescence intensity was monitored at 388 nm.

**Table S3** Comparison of **1** with recently reported  $\text{Fe}^{3+}$  sensors.

| Sensors                             | Response Type       | LOD ( $\mu\text{M}$ )                  | Reaction Media                                          | Rf |
|-------------------------------------|---------------------|----------------------------------------|---------------------------------------------------------|----|
| Dansyl Based derivative             | Fluorescence        | $6.2 \times 10^{-1}$                   | EtOH/ $\text{H}_2\text{O}$<br>(1:1, v/v)                | 4  |
| Poly Electrospun Nanofiber Hydrogel | Color               | 61.5                                   | $\text{H}_2\text{O}$                                    | 5  |
| Anthracene Based derivative         | Color               | $4.4 \times 10^{-1}$                   | DMF                                                     | 6  |
| Rhodamin derivation                 | Fluorescence        | $7.4 \times 10^{-1}$                   | $\text{CH}_3\text{CN}/\text{H}_2\text{O}$<br>(1:1, v/v) | 7  |
| Nitrogen-doped carbon dots          | Color               | $5.7 \times 10^{-1}$                   | CDs/PVA films                                           | 8  |
| <b>Our Works</b>                    | <b>Fluorescence</b> | <b><math>7.0 \times 10^{-2}</math></b> | <b><math>\text{H}_2\text{O}</math></b>                  |    |

**Table S4** Elemental analysis of **1**

| Standard                        |         | BBOT     |        |          |         |        |
|---------------------------------|---------|----------|--------|----------|---------|--------|
| Element                         | No.     | Nitrogen | Carbon | Hydrogen | Sulphur | Oxygen |
| Sample 1 :<br>Compound <b>1</b> | 1       | 0.041    | 73.090 | 6.852    | 0.143   | 10.910 |
|                                 | 2       | 0.037    | 73.129 | 6.984    | 0.080   | 10.788 |
|                                 | 3       | 0.038    | 73.252 | 6.989    | 0.000   | 10.710 |
|                                 | Average | 0.039    | 73.157 | 6.942    | 0.074   | 10.803 |

w/w %

## References

- (1) A. G. Crawford, Z. Liu, I. A. I. Mkhaliid, M.–H. Thibault, N. Schwarz, G. Alcaraz, A. Steffen, J. C. Collings, A. S. Batsanov, J. A. K. Howard, T. B. Marder, *Chem.: Eur. J.*, 2012, **18**, 5022.
- (2) J. Folch, M. Lees, GMS. Stanley, *J. Biol. Chem.*, 1957, **467**, 226.
- (3) T. P. L Ferraz, M. C. Fiuza, M. L. A. D. Santos, L. P. D. Carvalho, N. M. Soares, *J. Biochem. Biophys. Methods.*, 2004, **58**, 187.
- (4) Y. W. Choi, G. J. Park, Y. J. Na, H. Y. Jo, S. A. Lee, G. R. You, *Sens. Actuators B: Chem.*, 2014, **194**, 343.
- (5) C. Zhang, H. Li, Q. Yu, L. Jin, L. Y. Wang, *ACS. Omega.*, 2019, **4**, 14633.
- (6) A. Finelli, V. Chabert, N. Herault, A. Crochet, C. Kim, K. M. Fromm, *Inorg. Chem.*, 2019, **58**, 13796.
- (7) S. Li, D. Zhang, X. Xie, S. Ma, Y. Liu, Z. Xu, Y. Gao, Y. Ye, *Sens. Actuators B: Chem.*, 2016, **224**, 661.
- (8) X. Wu, C. Ma, J. Liu, Y. Liu, S. Luo, M. Xu, P. Wu, W. Li, S. Liu, *ACS Sustainable Chemistry & Engineering.*, 2019, **7**, 18801.

8.0573  
8.0421  
7.9983  
7.8919  
7.8739  
7.8441  
7.8288  
7.8136  
7.6129

4.1528  
4.1396  
4.1265  
3.5272

2.1967  
2.1818  
2.1665  
1.8263  
1.8118  
1.8092  
1.7969  
1.4983  
1.4839  
1.4701  
1.4544  
1.4512  
1.4391  
1.2496  
1.2453  
1.2192  
1.2130

Date\_ 20190604  
Time 19.48  
INSTRUM spect  
PROBHD 5 mm PABBO BB-  
PULPROG zg30  
TD 65536  
SOLVENT CD2Cl2  
NS 16  
DS 2  
SWH 10000.000 Hz  
FIDRES 0.152588 Hz  
AQ 3.2767999 sec  
RG 144  
DW 50.000 usec  
DE 6.50 usec  
TE 297.6 K  
D1 1.00000000 sec  
TD0 1

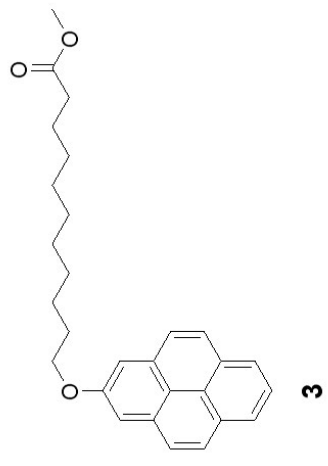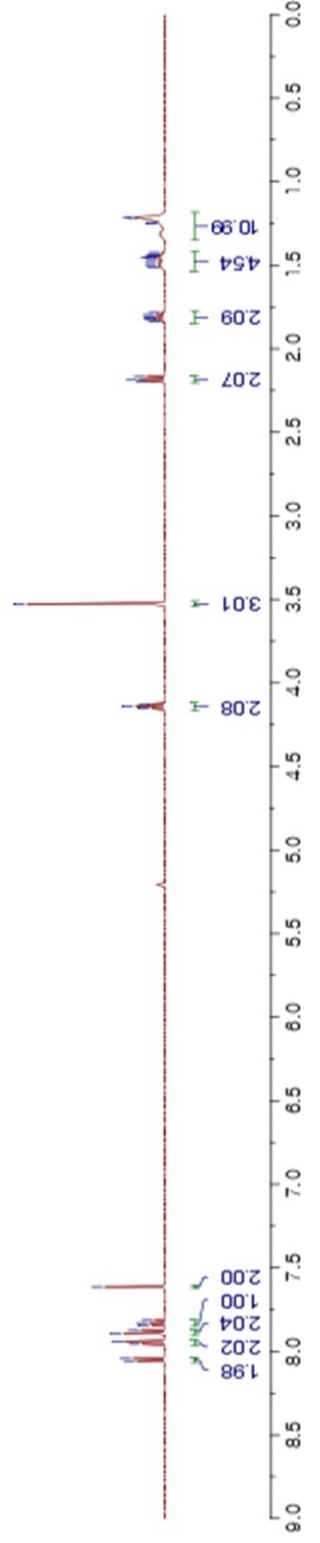



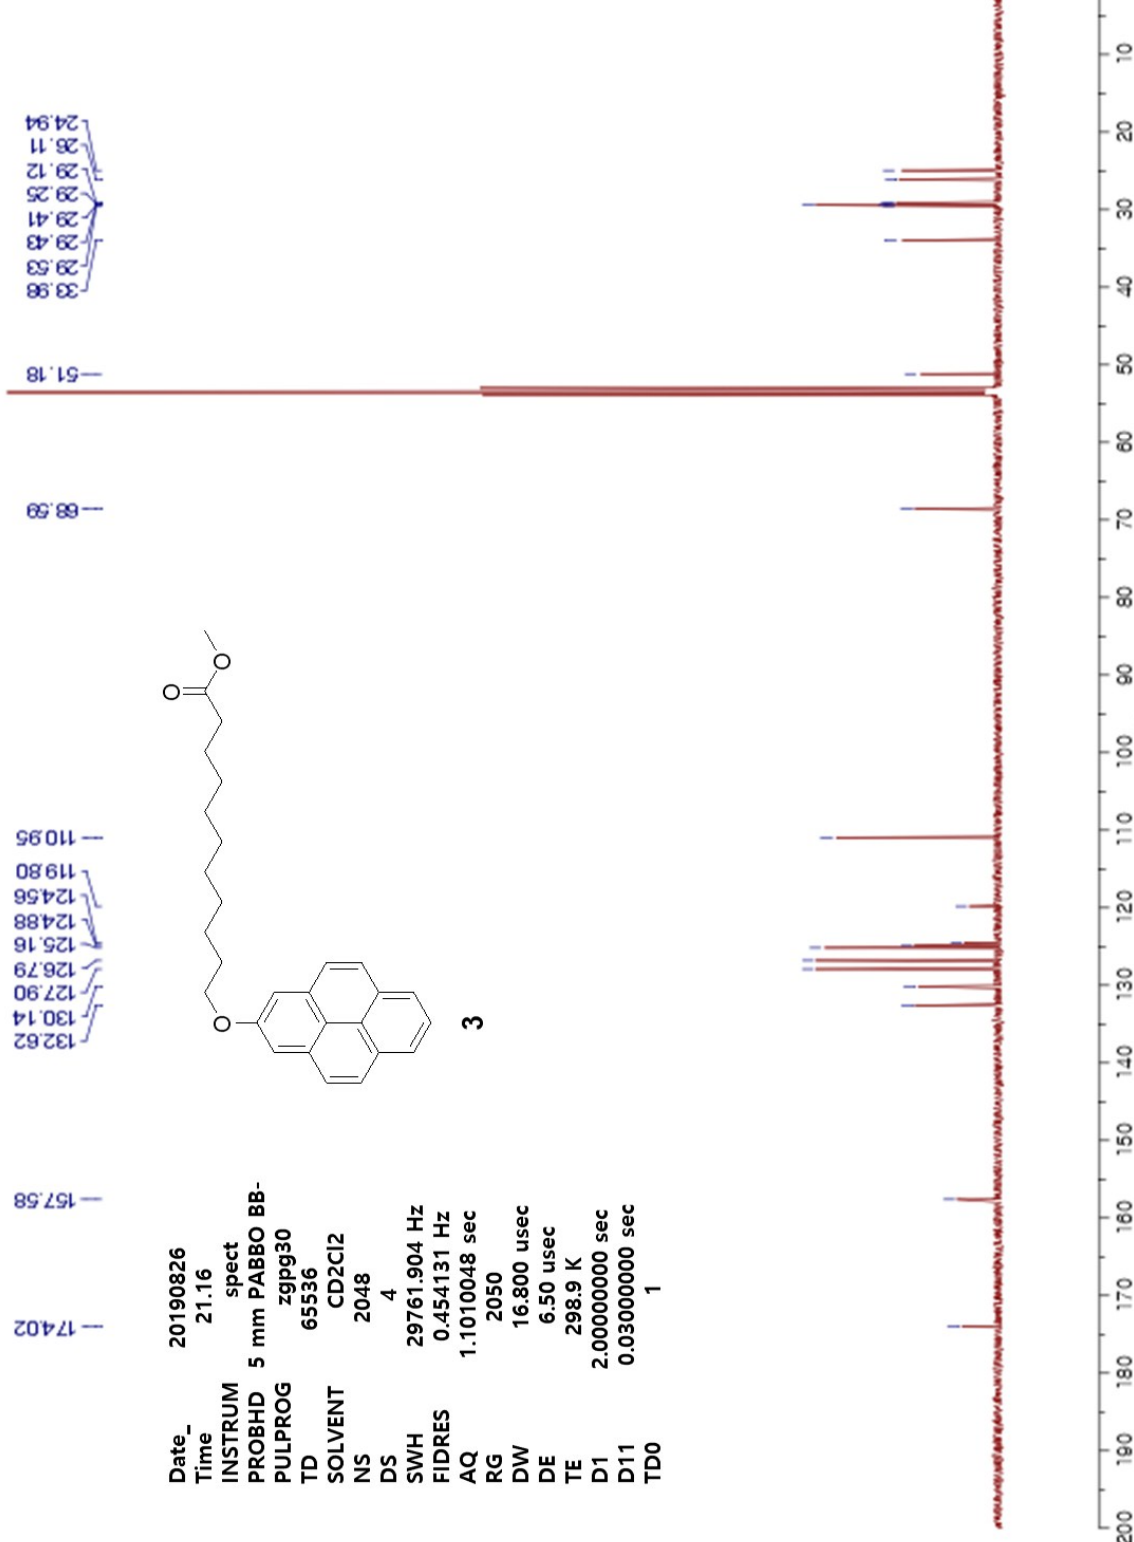

Date\_ 20190826  
 Time 21.16  
 INSTRUM spect  
 PROBHD 5 mm PABBO BB-  
 PULPROG zgpg30  
 TD 65536  
 SOLVENT CD2Cl2  
 NS 2048  
 DS 4  
 SWH 29761.904 Hz  
 FIDRES 0.454131 Hz  
 AQ 1.1010048 sec  
 RG 2050  
 DW 16.800 usec  
 DE 6.50 usec  
 TE 298.9 K  
 D1 2.0000000 sec  
 D11 0.03000000 sec  
 TD0 1

39.952  
39.788  
39.695  
39.603  
39.510  
39.417  
39.325  
39.232  
29.513  
29.195  
29.100  
28.863  
26.589  
25.621

67.965

132.157  
129.601  
127.805  
126.846  
125.221  
125.091  
123.795  
118.996  
111.003

157.102

175.718

Date\_ 20200204  
 Time 12.52 h  
 INSTRUM CAB AV4 900 MHZ EXT  
 PROBHD Z162829\_0001  
 PULPROG zgpg30  
 TD 65536  
 SOLVENT DMSO  
 NS 4096  
 DS 8  
 SWH 55555.555 Hz  
 FIDRES 1.695421 Hz  
 AQ 0.5898240 sec  
 RG 203  
 DW 9.000 usec  
 DE 20.00 usec  
 TE 298.2 K  
 D1 2.00000000 sec  
 D11 0.03000000 sec  
 TD0 1

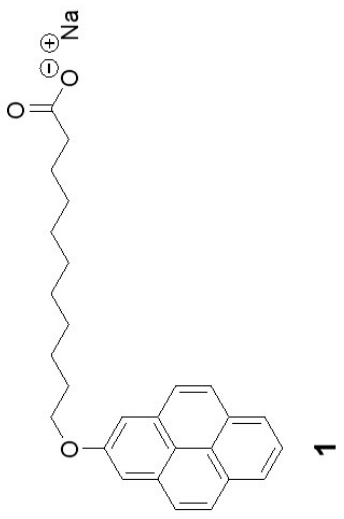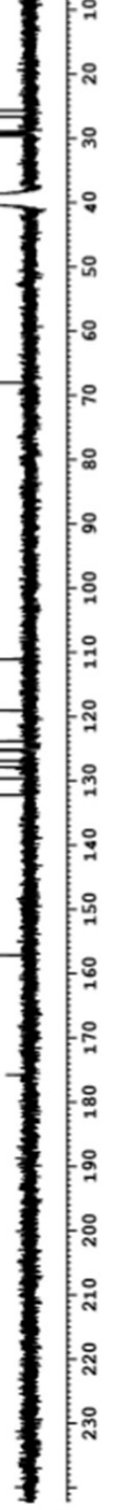



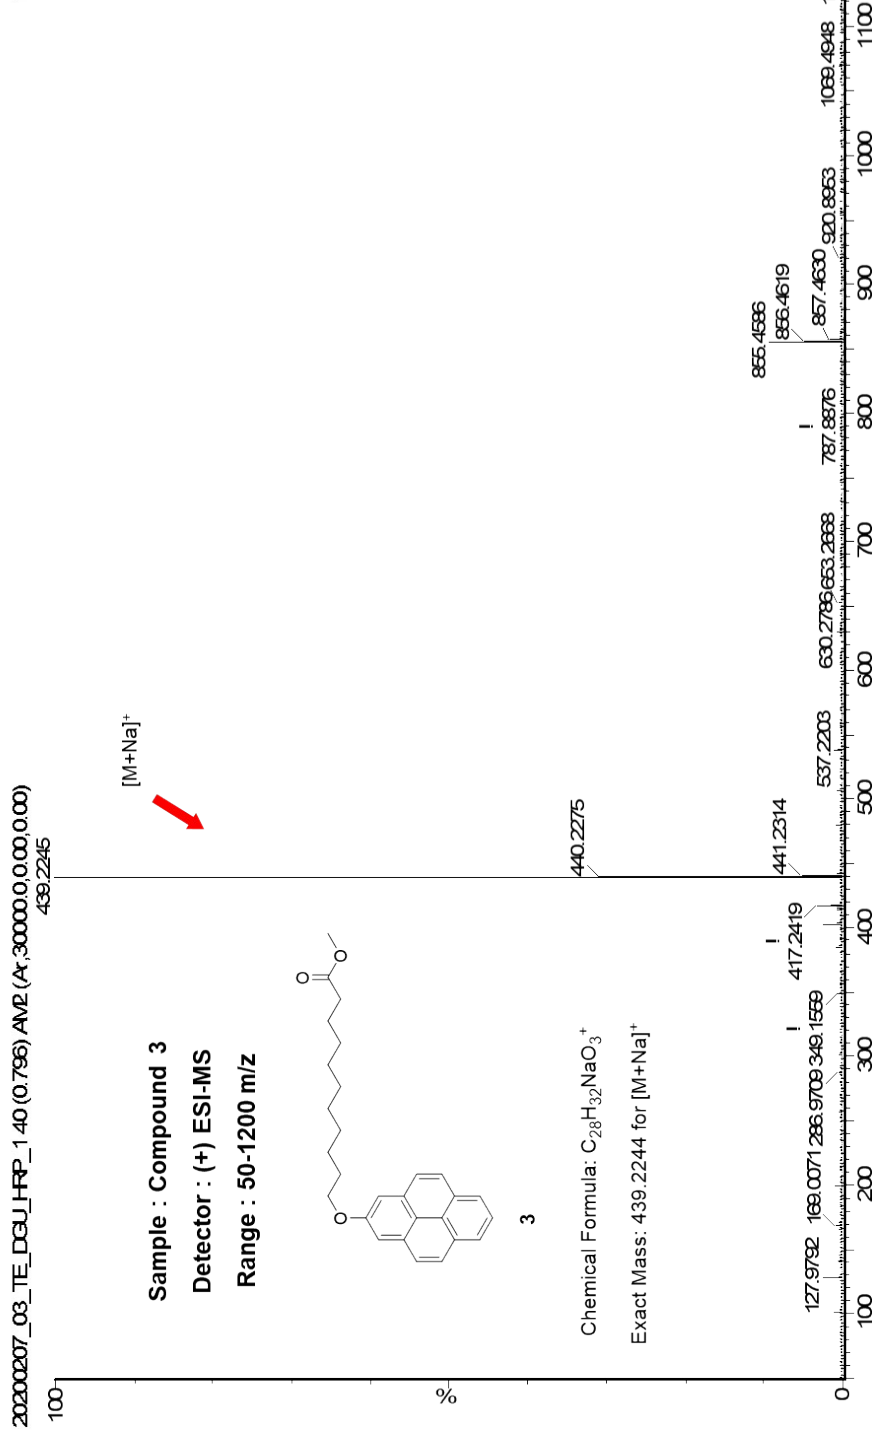

20200203\_01\_Compound\_DGJ\_HRP\_2\_11 (0.242) AVE (Ar:30000.0,0.00,0.00)

1:

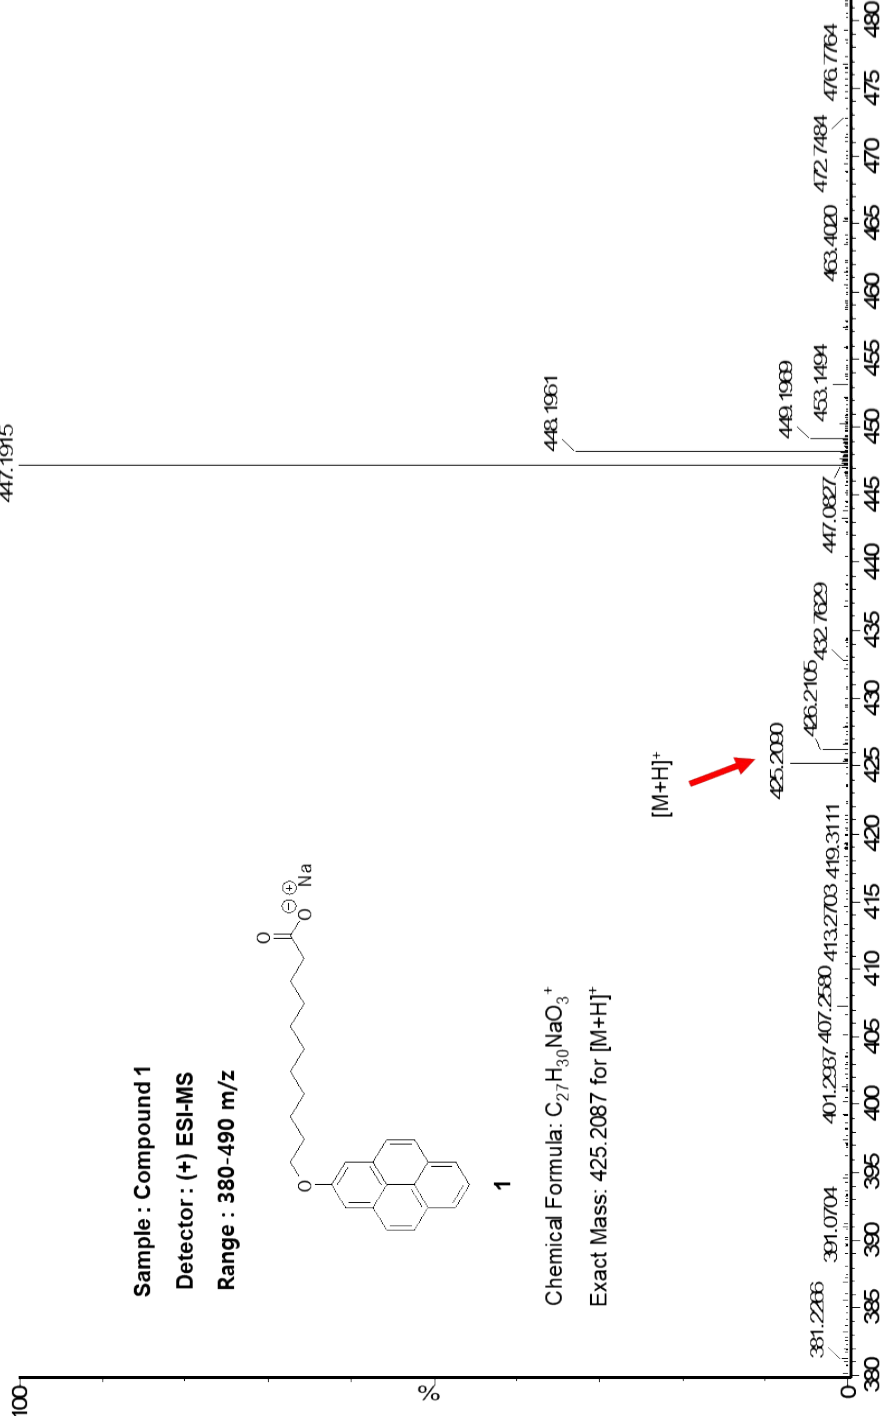

Sample : Compound 1

Detector : (+) ESI-MS

Range : 380-490 m/z

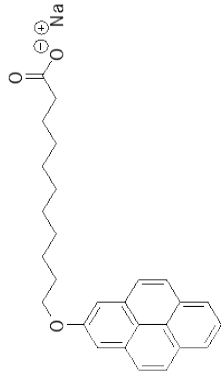

1

Chemical Formula: C<sub>27</sub>H<sub>30</sub>NaO<sub>3</sub><sup>+</sup>

Exact Mass: 425.2087 for [M+H]<sup>+</sup>
